# Supplementary material
Source: PubMed Central journal article supplement (PMC7139200)
Supplement: mmc1.pdf [file mmc1.pdf]

**Cell Metabolism, Volume 31**

**Supplemental Information**

**Mitochondria-Endoplasmic Reticulum Contacts  
in Reactive Astrocytes Promote Vascular Remodeling**

**Jana Göbel, Esther Engelhardt, Patric Pelzer, Vignesh Sakthivelu, Hannah M. Jahn, Milica Jevtic, Kat Folz-Donahue, Christian Kukat, Astrid Schauss, Christian K. Frese, Patrick Giavalisco, Alexander Ghanem, Karl-Klaus Conzelmann, Elisa Motori, and Matteo Bergami**

## Legends to Supplemental Figures

**Figure S1. Related to Figure 1. Characterization of organelle distribution across astrocytic territories *in vivo*.** **(A)** Left panel: example (confocal z-projection) of a cortical astrocyte transduced with an astrocyte-specific virus encoding for mitoRFP. The location of one astrocytic end-foot and soma (S) are depicted. Right panel: rendered image of mitoRFP (following deconvolution) of a single stack and the corresponding immunoreactivity for CD31 of nearby microvessels. Low panels shows zooms of each respective yellow boxed region. Bars, 15  $\mu\text{m}$ . **(B)** Left panel: example (confocal z-projection) of a cortical astrocyte transduced with an astrocyte-specific virus encoding for ER-GFP. The location of astrocytic end-feet and soma (S) are depicted. Right panel: rendered image of ER-GFP (following deconvolution) of a single stack and the corresponding immunoreactivity for CD31 of nearby microvessels. Low panels shows zooms of each respective yellow boxed region. Bars, 15  $\mu\text{m}$ . **(C)** Example of a cortical astrocyte transduced with an astrocyte-specific AAV encoding for a lysosomal marker (Emerald-Lamp1) and cytosolic mCherry. The location of astrocytic territories including end-foot, branches/branchlets and soma (S) is depicted. Immunostaining for CD31 shows the presence of nearby microvessels. The right panel shows the Emerald-Lamp1 channel reporting on the distribution of lysosomes. Bar, 15  $\mu\text{m}$ . **(D)** Zooms (surface rendered) of the boxed areas shown in **C**. Bar, 5  $\mu\text{m}$ . **(E)** Example of a cortical astrocyte transduced with an astrocyte-specific AAV encoding for a peroxisomal marker (mCherry-PeroX) and cytosolic BFP. The location of astrocytic territories including end-foot, branches/branchlets and soma (S) is depicted. Immunostaining for CD31 shows the presence of nearby microvessels. The right panel shows the mCherry-PeroX channel reporting on the distribution of peroxisomes. Bar, 15  $\mu\text{m}$ . **(F)** Zooms (surface rendered) of the boxed areas shown in **E**. Bar, 5  $\mu\text{m}$ . **(G)** Example of a portion of cortex in a brain section from tamoxifen-induced  $\text{Glast}::\text{CreER}^{\text{T2}}$  x  $\text{R26}^{\text{LSL-tdTomato}}$  mice immunostained for the endothelial marker CD31, showing the extent of perivascular end-feet wrapping around the vasculature. Bar, 50  $\mu\text{m}$ . **(H)** EM picture of a similar specimen as in **G** following immuno-gold processing against RFP. A superimposed red shadow identifies the location of the perivascular end-foot enriched in gold particles. The zoom

on the right illustrates the localization of gold particles within the end-foot surrounding the basal lamina.

**Figure S2. Related to Figure 2. Remodeling of astrocyte mitochondrial and ER networks**

**following SW-injury. (A)** Example of brain section from tamoxifen-induced hGFAP::CreER<sup>TM</sup> x R26<sup>LSL-mitoYFP</sup> mice immunostained for the astrocytic marker S100 $\beta$ . Left inset: zoom of a single S100 $\beta$ +/mitoYFP+ astrocyte. Right inset: quantification of recombination efficiency in the cortex. Bars, 20  $\mu$ m. **(B)** Examples of mitoYFP+ astrocytes in control (uninjured) and injured conditions (SW 7 days, astrocyte proximal to the lesion track) showing the presence of CD45+ leukocytes (labeled in cyan) after SW injury. Bars, 15  $\mu$ m. **(C)** Examples of a mitoYFP+ (left) and an ER-GFP+ (right) astrocyte following injury (SW 7 days) showing co-labeling for the endothelial marker CD31. Zooms of the boxed regions depict the end-foot. Bar, 20  $\mu$ m. **(D)** Quantification of astrocytic mitochondrial mass (total mitoYFP volume per astrocyte) in control (uninjured conditions, time 0) or following stab-wound injury (SW) at 7 and 28 days. Mitochondrial mass was normalized to that of control astrocytes at time 0. N= 22 (time 0), 32 (time 7 days) and 29 (time 28 days) astrocytes obtained from 3 different mice for each time point (one-way ANOVA followed by Kruskal-Wallis test). **(E)** Density of mitoYFP+ signal in peripheral branches of resting or reactive astrocyte at the indicated conditions (n $\geq$  33 astrocytes obtained from 3 mice/condition) (one-way ANOVA followed by Kruskal-Wallis test). **(F)** Scheme depicting the approach utilized for FACS and proteomic analysis of astrocytes following SW-injury. **(G)** Heat maps of normalized LFQ (label-free quantification) intensities of detected proteins regulating mitochondrial fission and fusion dynamics at the indicated time points after injury and color-coded according to their z-score (n= 6 mice per time point). **(H)** Heat maps of normalized LFQ (label-free quantification) intensities of detected proteins associated to mitochondrial biogenesis (Tfam and Nrf1) as well as with mitochondrial mass (Timm and Tomm proteins) (n= 6 mice per time point). Significant changes ( $-\log_{10}$  of the p-value  $\geq$ 1.3) are indicated with an asterisk. **(I)** Examples of a reconstructed ER-GFP astrocyte

(same as Figure 2J) following volume masking, segmentation of the indicated compartments (end-feet, soma and branches) and subsequent fractionation of the ER-GFP signal in each of these compartments to obtain the signal densities displayed in panel L. Bar, 20  $\mu\text{m}$ . **(J)** Quantification of vessel diameter in the same dataset utilized to examine the ER-GFP perivascular g-ratio of Figure 2K. The plot shows data collected during a time course ranging from time 0 (uninjured) to 28 days after injury ( $n \geq 35$  vessels/time-point; nonparametric Kruskal-Wallis test). **(K)** 3D examples of ER-GFP labelled reactive astrocytes at 7 and 28 days post-SW. Volume segmentation into end-feet (according to direct contact with the labelled vasculature), soma and branches is shown in different colors. Lower panels depict the ER-GFP signal density in pseudocolors. A zoom of a perivascular end-foot is shown. Bars, 10  $\mu\text{m}$ . **(L)** Quantification of the fractional ER-GFP signal density across the three indicated astrocytic compartments in uninjured ( $n = 15$  cells, 3 mice) or injured (7 days,  $n = 13$  cells, 3 mice; 28 days,  $n = 22$  cells, 2 mice) astrocytes. **(M)** Quantification of ER-GFP total volume per astrocyte. Right graph: average number of end-feet for the analysed ER-GFP expressing astrocytes as in L (one-way ANOVA followed by Dunn's post-hoc test). \*,  $p < 0.05$ , \*\*,  $p < 0.01$ , \*\*\*,  $p < 0.001$ .

**Figure S3. Related to Figure 3 and 4. Label-free proteomic analysis of reactive *Mfn2*<sup>ckO</sup> and *Mfn1*<sup>ckO</sup> astrocytes responding to SW-injury.** **(A)** Scheme showing the genotyping approach used for validating the conditional knock-out of *Mfn1* and *Mfn2* in cortical astrocytes *in vivo*. **(B)** Genotyping of isolated cortices from tamoxifen-induced *Mfn1*<sup>ckO</sup>, *Mfn2*<sup>ckO</sup> and relative control littermates (*Mfn1*<sup>WT</sup> and *Mfn2*<sup>WT</sup>). The upper gels report on the genotyping protocol to detect wild-type and floxed alleles for each gene, while the lower gels report on the deletion (knock-out) band originating from recombined astrocytes. **(C)** Volcano plot of *Mfn2*<sup>ckO</sup> reactive astrocytes (~3280 detected proteins, ~2500 quantified) showing their relative expression levels ( $\log_2$  fold change) compared to reactive *Mfn2*<sup>WT</sup> (Ctrl) astrocytes obtained from tamoxifen-induced littermates. Proteins with a  $p$ -value  $\leq 0.05$  (i.e.  $\geq 1.3$  on the  $-\log_{10}$

scale) are considered significant. Proteins annotated in the Mitocarta 2.0 are outlined in red (n= 4 *Mfn2*<sup>ckO</sup> mice and 3 Ctrl mice). **(D)** Heat map of normalized LFQ intensities of astrocytic markers of reactivity identified in our proteomics dataset and color-coded according to their z-score. Significant changes ( $-\log_{10}$  of the *p*-value  $\geq 1.3$ ) are indicated with an asterisk at the beginning of each row. **(E)** Plot showing the increased expression of MFN2 in sorted *Mfn1*<sup>ckO</sup> astrocytes at 28 days following injury. The left column reports on the distribution of the whole proteome in *Mfn1*<sup>ckO</sup> astrocytes. MFN2 expression is significantly up-regulated under these conditions (\*\*, *p* value <0.01). **(F)** Ingenuity Pathway Analysis (IPA) of the proteome of *Mfn2*<sup>ckO</sup> and *Mfn1*<sup>ckO</sup> astrocytes disclosing significantly up- (red) and down-regulated (blue) pathways (bars indicate the  $-\log_{10}$  of the *p*-value starting with a minimum cut-off of 1.3). Besides several shared pathways, *Mfn2*<sup>ckO</sup>-specific up-regulated pathways included Wnt/ $\beta$ -catenin, Insulin Receptor Signaling, Methylmalonyl and 2-oxanobutanoate Degradation and Ca<sup>2+</sup> Transport. Of the down-regulated pathways, OXPHOS and Regulation of eIF4 and p70S6K Signaling appeared to be specific for *Mfn2*<sup>ckO</sup> astrocytes (n= 4 *Mfn2*<sup>ckO</sup> mice, 4 *Mfn1*<sup>ckO</sup> mice and 3 Ctrl mice). **(G)** Heat maps of normalized LFQ (label-free quantification) intensities of detected OXPHOS complex subunits (complexes I to V) color-coded according to their z-score (n= 4 *Mfn2*<sup>ckO</sup> mice, 4 *Mfn1*<sup>ckO</sup> mice and 3 Ctrl mice). Significant changes ( $-\log_{10}$  of the *p*-value  $\geq 1.3$ ) are indicated with an asterisk at the beginning of each row. **(H)** Heat maps of normalized LFQ intensities of detected proteins associated to mitochondrial stress responses color-coded according to their z-score. Significant changes ( $-\log_{10}$  of the *p*-value  $\geq 1.3$ ) are indicated with an asterisk at the beginning of each row.

**Figure S4. Related to Figure 4. Mitochondrial network changes in astrocytes following deletion of *Mfn2* or *Mfn1*.** **(A)** Surface rendering examples of mitochondrial morphologies detected in Ctrl, *Mfn2*<sup>ckO</sup> and *Mfn1*<sup>ckO</sup> resting astrocytes (i.e., uninjured animals). Yellow arrowheads point to the soma. Zooms of the boxed areas depict the predominant network morphology in peripheral processes. Bar, 15  $\mu$ m. **(B)** Examples of ER-RFP+ resting astrocytes (i.e., in uninjured mice) showing the distribution of the ER in relation to CD31 immunostaining.

Yellow arrowheads point to the soma. Zooms of the boxed regions depict the end-feet. Bar, 20  $\mu\text{m}$ . **(C)** Top panels: 3D volume reconstructions showing Ctrl, Mfn2<sup>ckO</sup> and Mfn1<sup>ckO</sup> astrocytes (arrowheads point to the soma) surrounding dextran-labelled vessels at 7 days post-SW. Bottom pictures show single-stack views highlighting the extent of perivascular mitochondria for each condition. Bar, 20  $\mu\text{m}$ . **(D)** EM pictures of astrocytic end-feet in Mfn2<sup>WT</sup> and Mfn2<sup>ckO</sup> mice at 4 weeks post-SW, showing the extent and morphology of perivascular mitochondria. Images were taken in proximity to the lesion track. Insets depict zooms of mitochondrial cristae. EC: endothelial cell; BL: basal lamina. Bars, 500 nm. **(E)** Details of astrocytic end-feet showing the morphology of ER tubules in Mfn2<sup>WT</sup> and Mfn2<sup>ckO</sup> mice. Bar, 500 nm. **(F)** Quantification of the indicated ultrastructural parameters in Mfn2<sup>WT</sup> (n= 18 vessel cross-sections from 3 mice) and Mfn2<sup>ckO</sup> perivascular end-feet (n= 24 vessel cross-sections from 3 mice; non-parametric Mann-Whitney t-test). \*\*\*, p < 0.001.

**Figure S5. Related to Figure 5. Mitochondrial and cytosolic Ca<sup>2+</sup> dynamics in Mfn2<sup>ckO</sup> astrocytes.** **(A)** Schematic illustrating the experimental protocol used to transduce astrocytes in hGFAP-TVA mice with an EnvA-RABV encoding for the photoactivatable mito-GFP sensor (mito-PA-GFP). Seven days after virus delivery, 2PLSM in fresh brain slices was utilized to assess mitochondrial fusion dynamics in transduced cortical astrocytes. ROI photoactivation in selected astrocytic processes was achieved by laser illumination in the UV range (840 nm at 10% of laser power for 10 seconds), which resulted in bright GFP emission. Time-lapse was performed to follow the fate of the photoactivated mitochondria, which in case of fusion occurring would lead to sudden appearance in the GFP channel of “new” (non-photoactivated) mitochondria, with concomitant dilution of GFP signal intensity in initially photoactivated mitochondria undergoing fusion. **(B)** Example of a mito-PA-GFP-expressing astrocyte surrounded by small and large vessels (indicated by yellow arrows) recognizable by the characteristic mitochondrial outlining into tube-like structures. The laser intensity utilized for GFP detection (920 nm) was slightly increased during preliminary acquisition to identify the

morphological appearance of weak PA-GFP-expressing mitochondria along processes and putative end-feet. Boxed areas point to selected ROIs prior photoactivation. Panels on the right depict selected time points of the z-scan time-lapse which was carried out for at least 1 hour following initial photoactivation (for time-lapse, the laser was tuned back to 920 nm with intensity lower than 1%, one z-scan every 3 minutes). Following z-stack image registration, direct comparison of GFP signal between time points was examined manually. Arrowheads point to fusion events, which are recognizable by the abrupt decrease in GFP intensity in photoactivated mitochondria due to GFP dilution into the newly appearing (fusing) mitochondria. Mitochondria that were identified for simply moving away from the photoactivated ROI and did not satisfy these parameters were not considered in our quantification. Bar, 20  $\mu$ m. **(C)** Quantification of fusion rates in astrocytic end-feet and branches over the course of 1 hour of imaging (n= 17 astrocytes from 4 mice). Note the overall low fusion rate under resting conditions in both branches and end-feet. **(D)** Schematic showing AAV-mediated cytoGCaMP6f expression in astrocytes followed by 2PLSM in slices and subsequent AstroSparks analysis. **(E)** Example of cytoGCaMP6-expressing astrocytes in brain slice following AstroSparks processing and ROI detection (ROIs in end-feet are depicted in white). Right panels depict ROI traces and corresponding raster plots. Bar, 20  $\mu$ m. **(F)** Quantification of cytosolic Ca<sup>2+</sup> transients in astrocytic end-feet of wild-type (Ctrl), Mfn2<sup>ckO</sup> and Mfn1<sup>ckO</sup> astrocytes under the indicated conditions (n $\geq$  20 cells from 2-3 different mice per time and condition). **(G)** Frequency of cytosolic and mitochondrial Ca<sup>2+</sup> transients within branches of Mfn2<sup>ckO</sup> astrocytes quantified utilizing the indicated sensors and under the specified conditions (n $\geq$  20 cells from 2-3 mice per time and condition). \*, p < 0.05, \*\*, p < 0.01, \*\*\*, p < 0.001 (non-parametric Mann-Whitney t-test).

**Figure S6. Related to Figure 6. Assessment of cell proliferation in injured Mfn2<sup>ckO</sup> mice.**

**(A)** Example of reconstructed cortical vascular network following filament tracing (in white). Systematic inspection of the traced network led to the identification of potential artifacts (false segments, in yellow), which were corrected by manual selection and subsequent elimination.

Bar, 100  $\mu\text{m}$ . **(B)** Top views of control and  $\text{Mfn1}^{\text{cKO}}$  cleared cortices showing the extent of dextran-filled vasculature at 7 days post-SW. Arrowheads point to the lesion track. Insets depict zooms of the lesioned core region (circled in white). Bar, 200  $\mu\text{m}$ . **(C)** Quantification of branch points, fractional volume and total length of the vascular network in  $\text{Mfn1}^{\text{WT}}$  and  $\text{Mfn1}^{\text{cKO}}$  cortices ( $n= 3-4$  mice/condition; two-way ANOVA followed by Tukey's post-hoc test). **(D)** Pictures depicting large views of the injured cortex in  $\text{Mfn2}^{\text{WT}}$  and  $\text{Mfn2}^{\text{cKO}}$  mice at 7 days post-SW and following immunostaining for the nuclear marker SOX2 (labeling astrocytes) as well as EdU. Insets show co-localization of EdU with SOX2 (indicated by yellow arrowheads). Bar, 100  $\mu\text{m}$ . **(E)** Quantification of total proliferating cells (upper graph) as well as proliferating astrocytes (SOX2+/EdU+) within the area surrounding the lesion track in  $\text{Mfn2}^{\text{WT}}$  and  $\text{Mfn2}^{\text{cKO}}$  mice at 7 days post-SW ( $n= 4-5$  mice/condition; nonparametric Mann-Whitney t-test). **(F)** Fraction of endothelial (ERG+) as well as astrocytic (SOX2+) cells being double positive for EdU within the area surrounding the lesion track in  $\text{Mfn2}^{\text{WT}}$  and  $\text{Mfn2}^{\text{cKO}}$  mice at 7 days post-SW ( $n= 4-5$  mice/condition; nonparametric Mann-Whitney t-test). \*,  $p < 0.05$ , \*\*,  $p < 0.01$ , \*\*\*,  $p < 0.001$ .

**Figure S7. Related to Figure 6 and 7. Analysis of astrocytic mitochondrial morphology and  $\text{Ca}^{2+}$  dynamics following synthetic linker expression.** **(A)** Examples of  $\text{Mfn2}^{\text{cKO}}$  brain sections (obtained from  $\text{Mfn2}^{\text{lox/lox}} \times \text{Glast}::\text{CreERT2} \times \text{R26}^{\text{LSL-tdTomato}}$ ) and corresponding control samples bearing tdTomato fluorescence in astrocytes. Brain sections were immunostained for the endothelial marker CD31 in order to reveal the vascular network at 7 days following SW-injury. Bar, 100  $\mu\text{m}$ . **(B)** Zoom of reactive tdTomato+ astrocytes at 7 days post-SW in close proximity to the lesion. Pictures depict the polarized morphology of  $\text{Mfn2}^{\text{WT}}$  and  $\text{Mfn2}^{\text{cKO}}$  reactive astrocytes and a comparable extent of perivascular wrapping around the CD31+ vessels. Bar, 10  $\mu\text{m}$ . **(C)** Quantification of astrocyte density within the injured cortices of  $\text{Mfn2}^{\text{WT}}$  and  $\text{Mfn2}^{\text{cKO}}$  tdTomato-expressing mice ( $n= 4$  mice per condition; nonparametric Mann-Whitney t-test). **(D)** Quantification of perivascular mitochondrial fragmentation (i.e., fraction of perivascular fragmented mitochondria as calculated in Figure 2D) in  $\text{Mfn2}^{\text{cKO}}$



astrocytes following transduction with AAV-ctrl or AAV-linker (n= 3 mice per condition; one-way Anova followed by Dunn's multiple comparison). **(E)** Scheme showing the AAV constructs utilized to express mitoGCaMP6f in tandem with OMM-mRFP-ER (or its control, OMM-mRFP) in astrocytes. **(F)** Experimental design showing AAV delivery followed by 2PLSM in slices and mitochondrial Ca<sup>2+</sup> uptake analysis via AstroSparks. **(G)** Example of mitoGCaMP6-expressing Mfn2<sup>ckO</sup> astrocytes in brain slice transduced with either AAV-linker or AAV-ctrl and following AstroSparks processing and ROI analysis (ROIs in the end-feet are depicted in white, while the processes appear in red). Right panels depicts ROI traces and corresponding raster plots. Bar, 20 μm. **(H)** Quantification of the amplitude and duration of mitochondrial Ca<sup>2+</sup> events in branches and end-feet of Mfn2<sup>ckO</sup> astrocytes transduced with the AAV-linker or AAV-ctrl (n≥ 29 cells per time and condition). **(I)** Analysis of branching points and total vessel length in CD31 immunostained brain sections obtained from Mfn2<sup>WT</sup> and Mfn2<sup>ckO</sup> injured mice (n= 3 mice/condition; nonparametric Mann-Whitney t-test). \*, p < 0.05, ns, not significant.

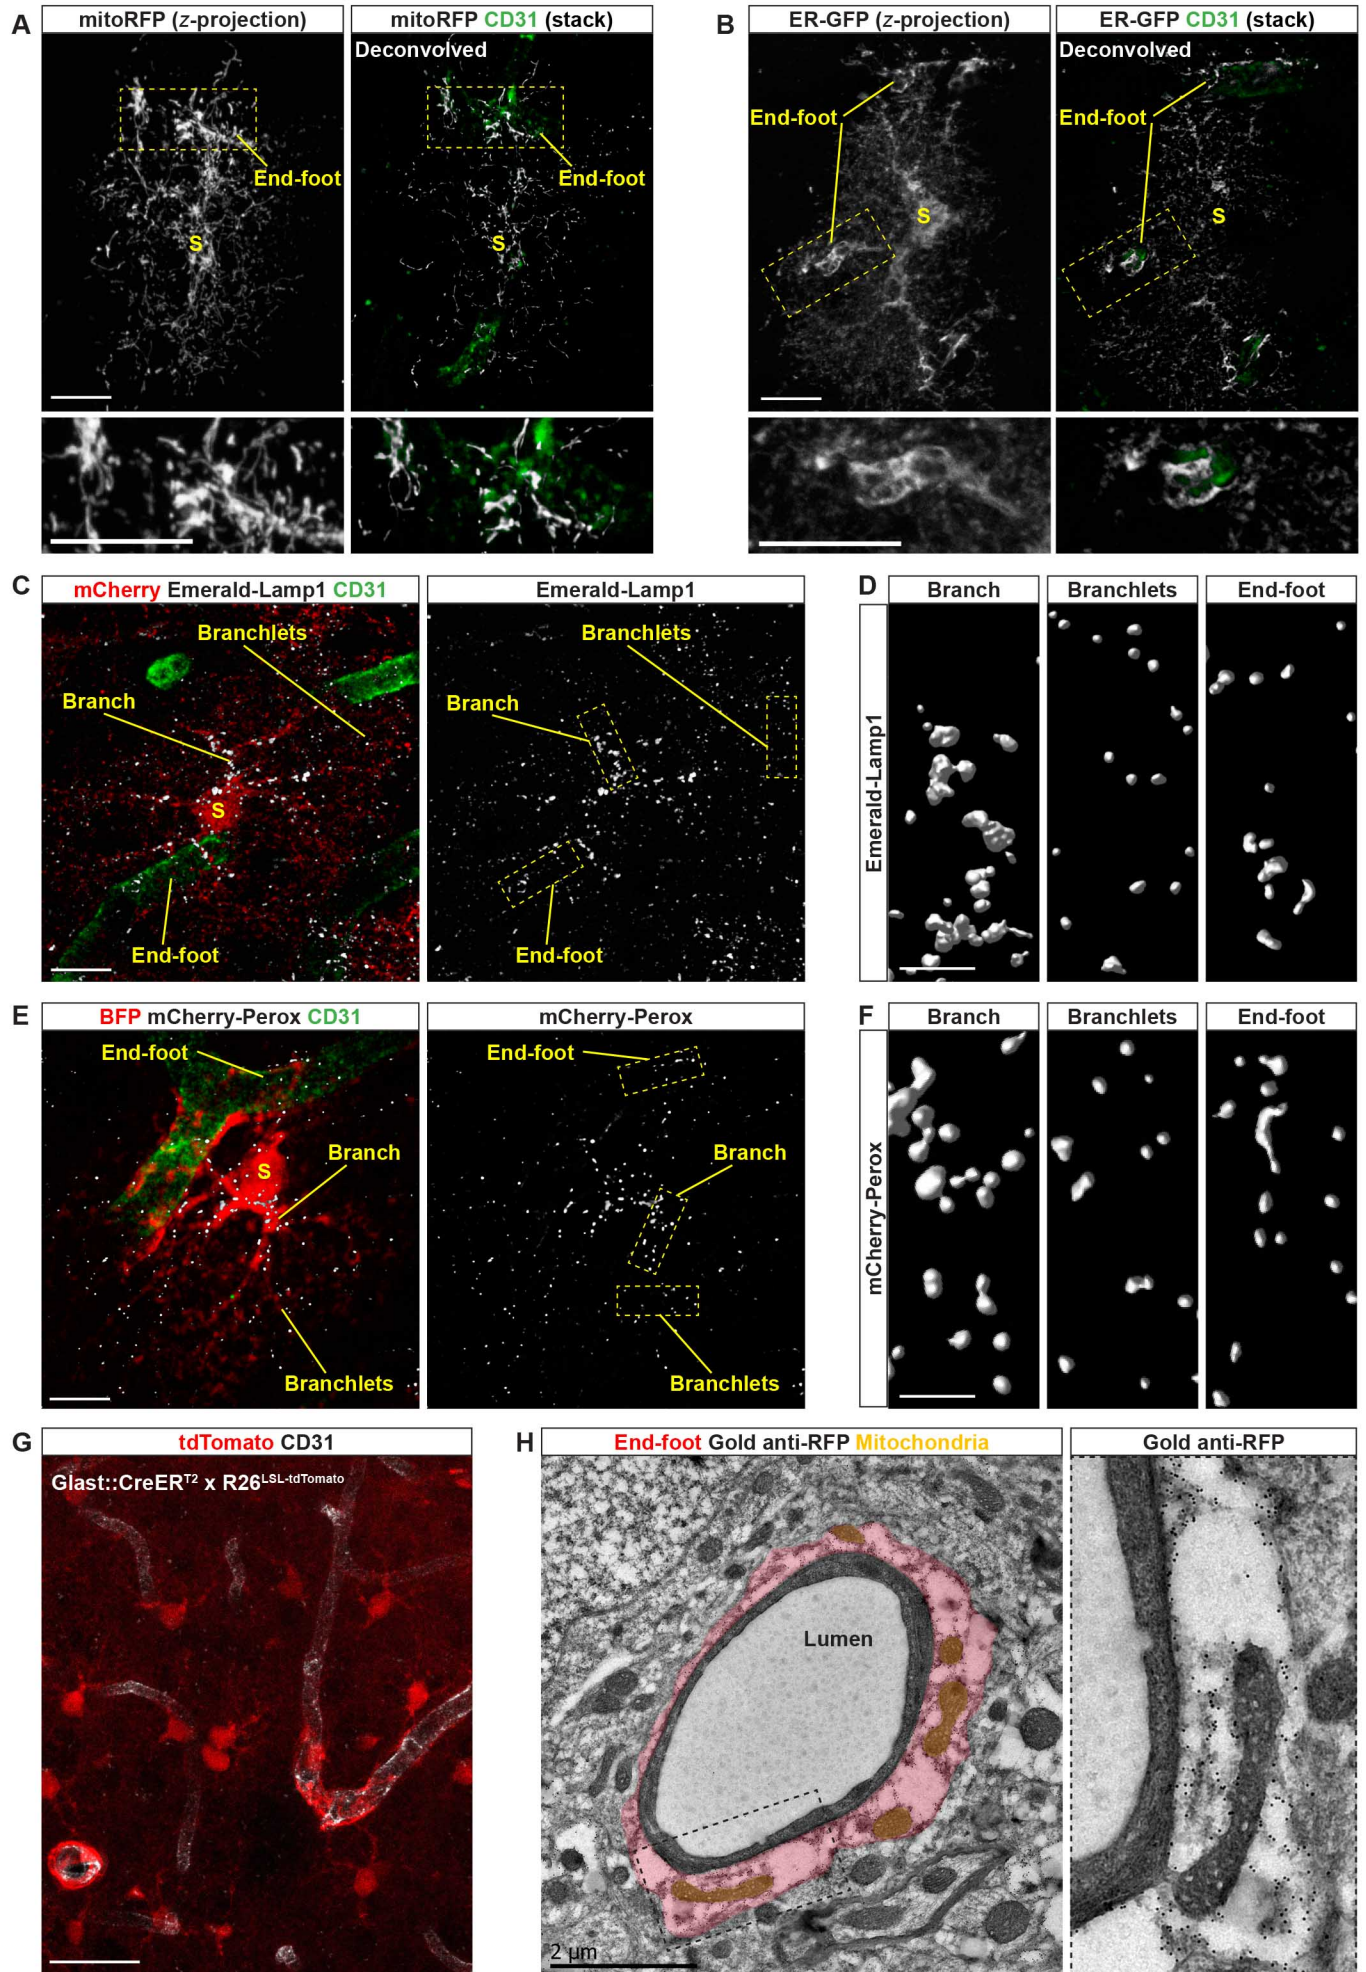

Figure S1

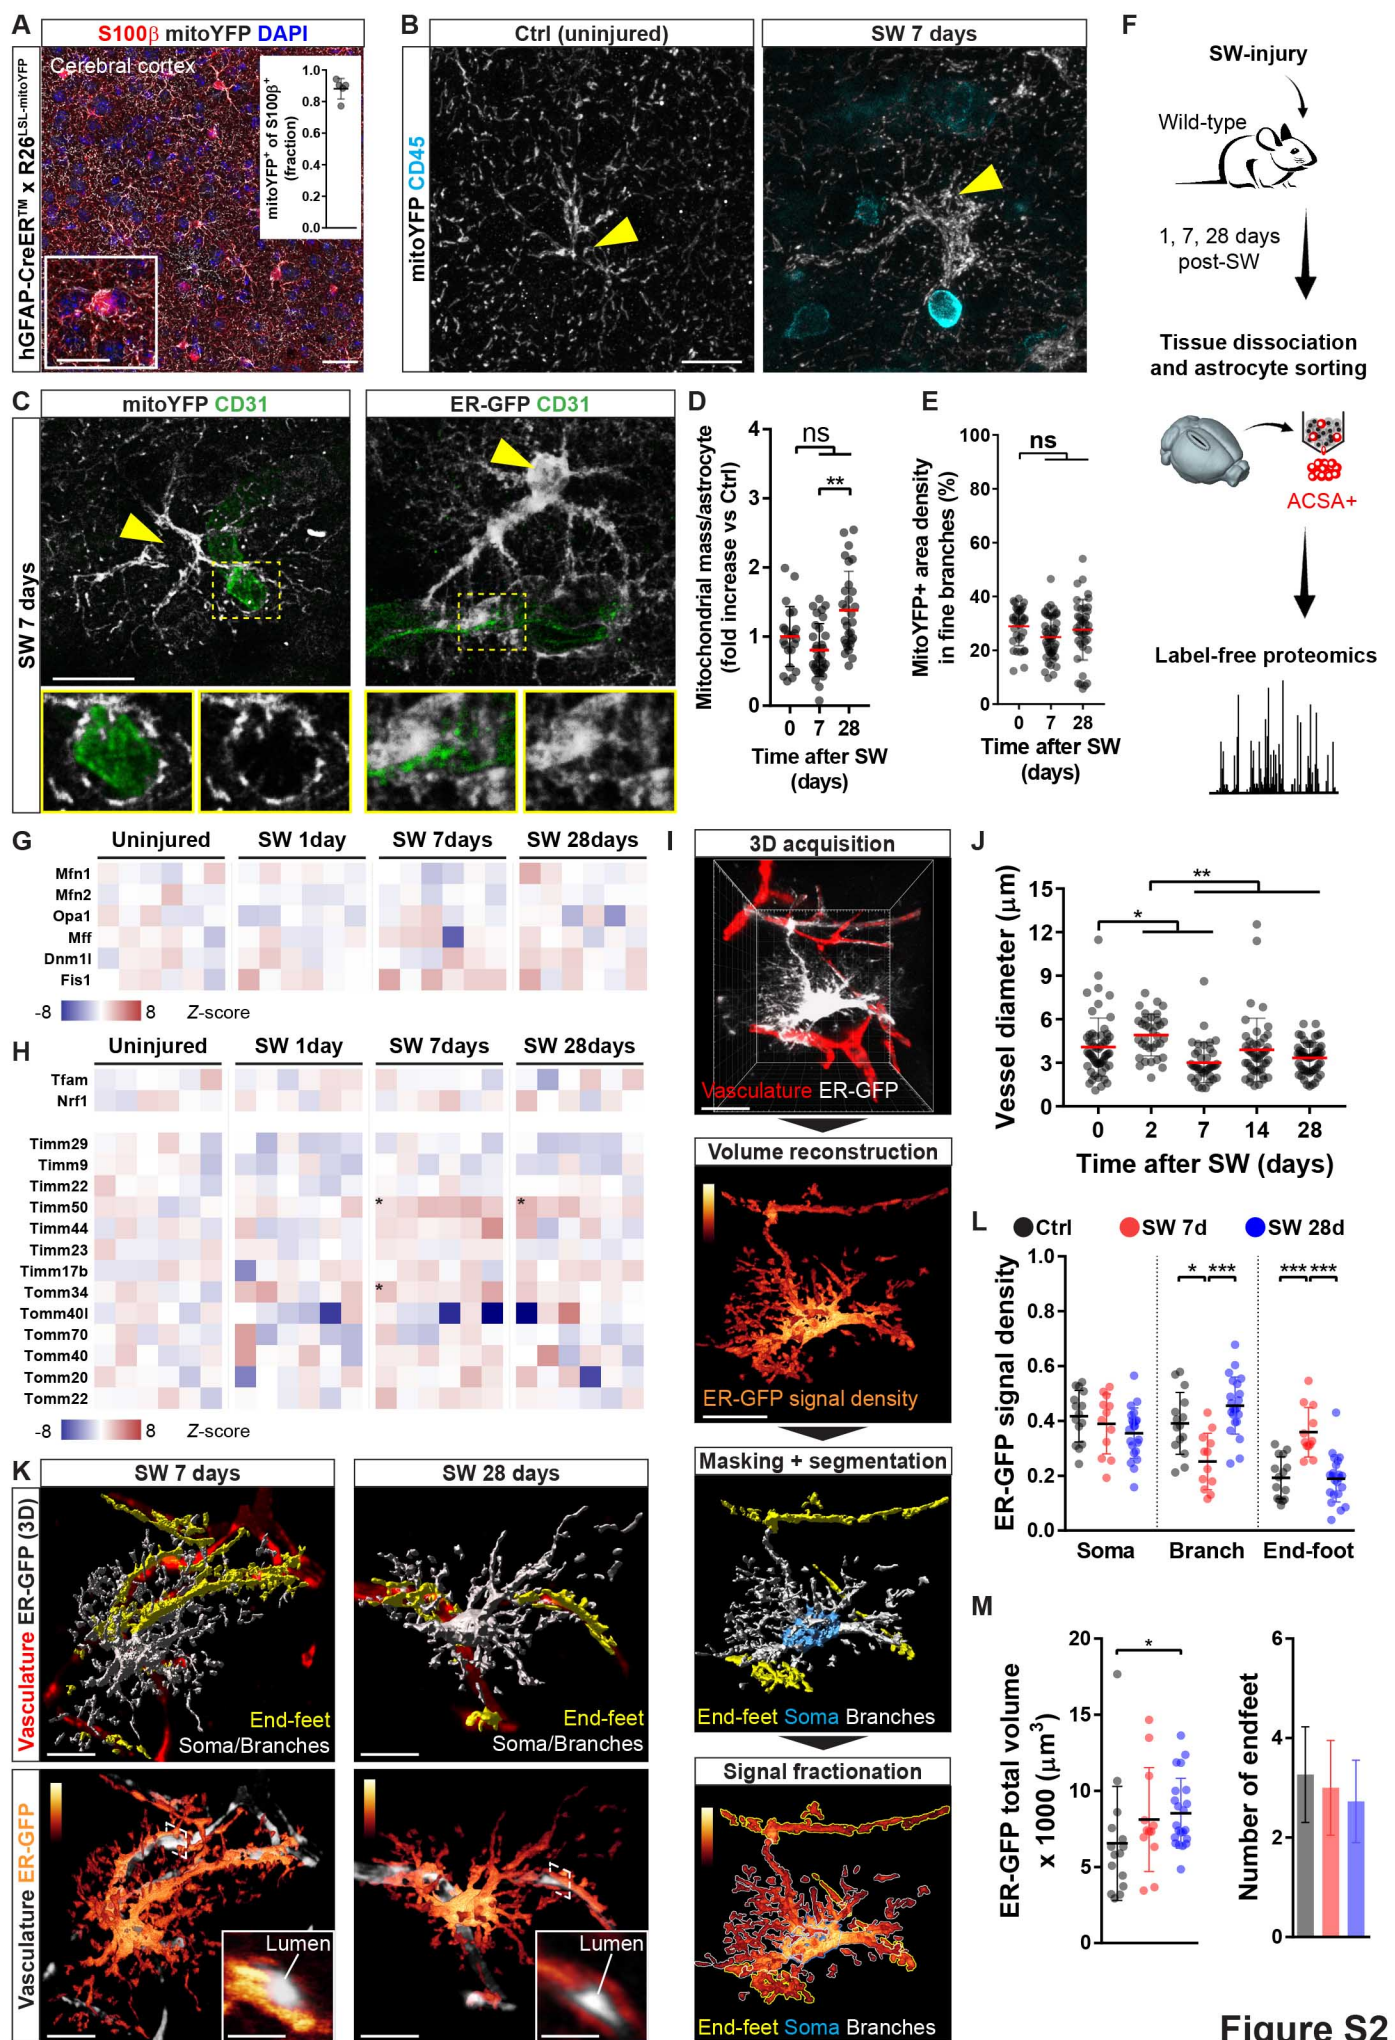

Figure S2

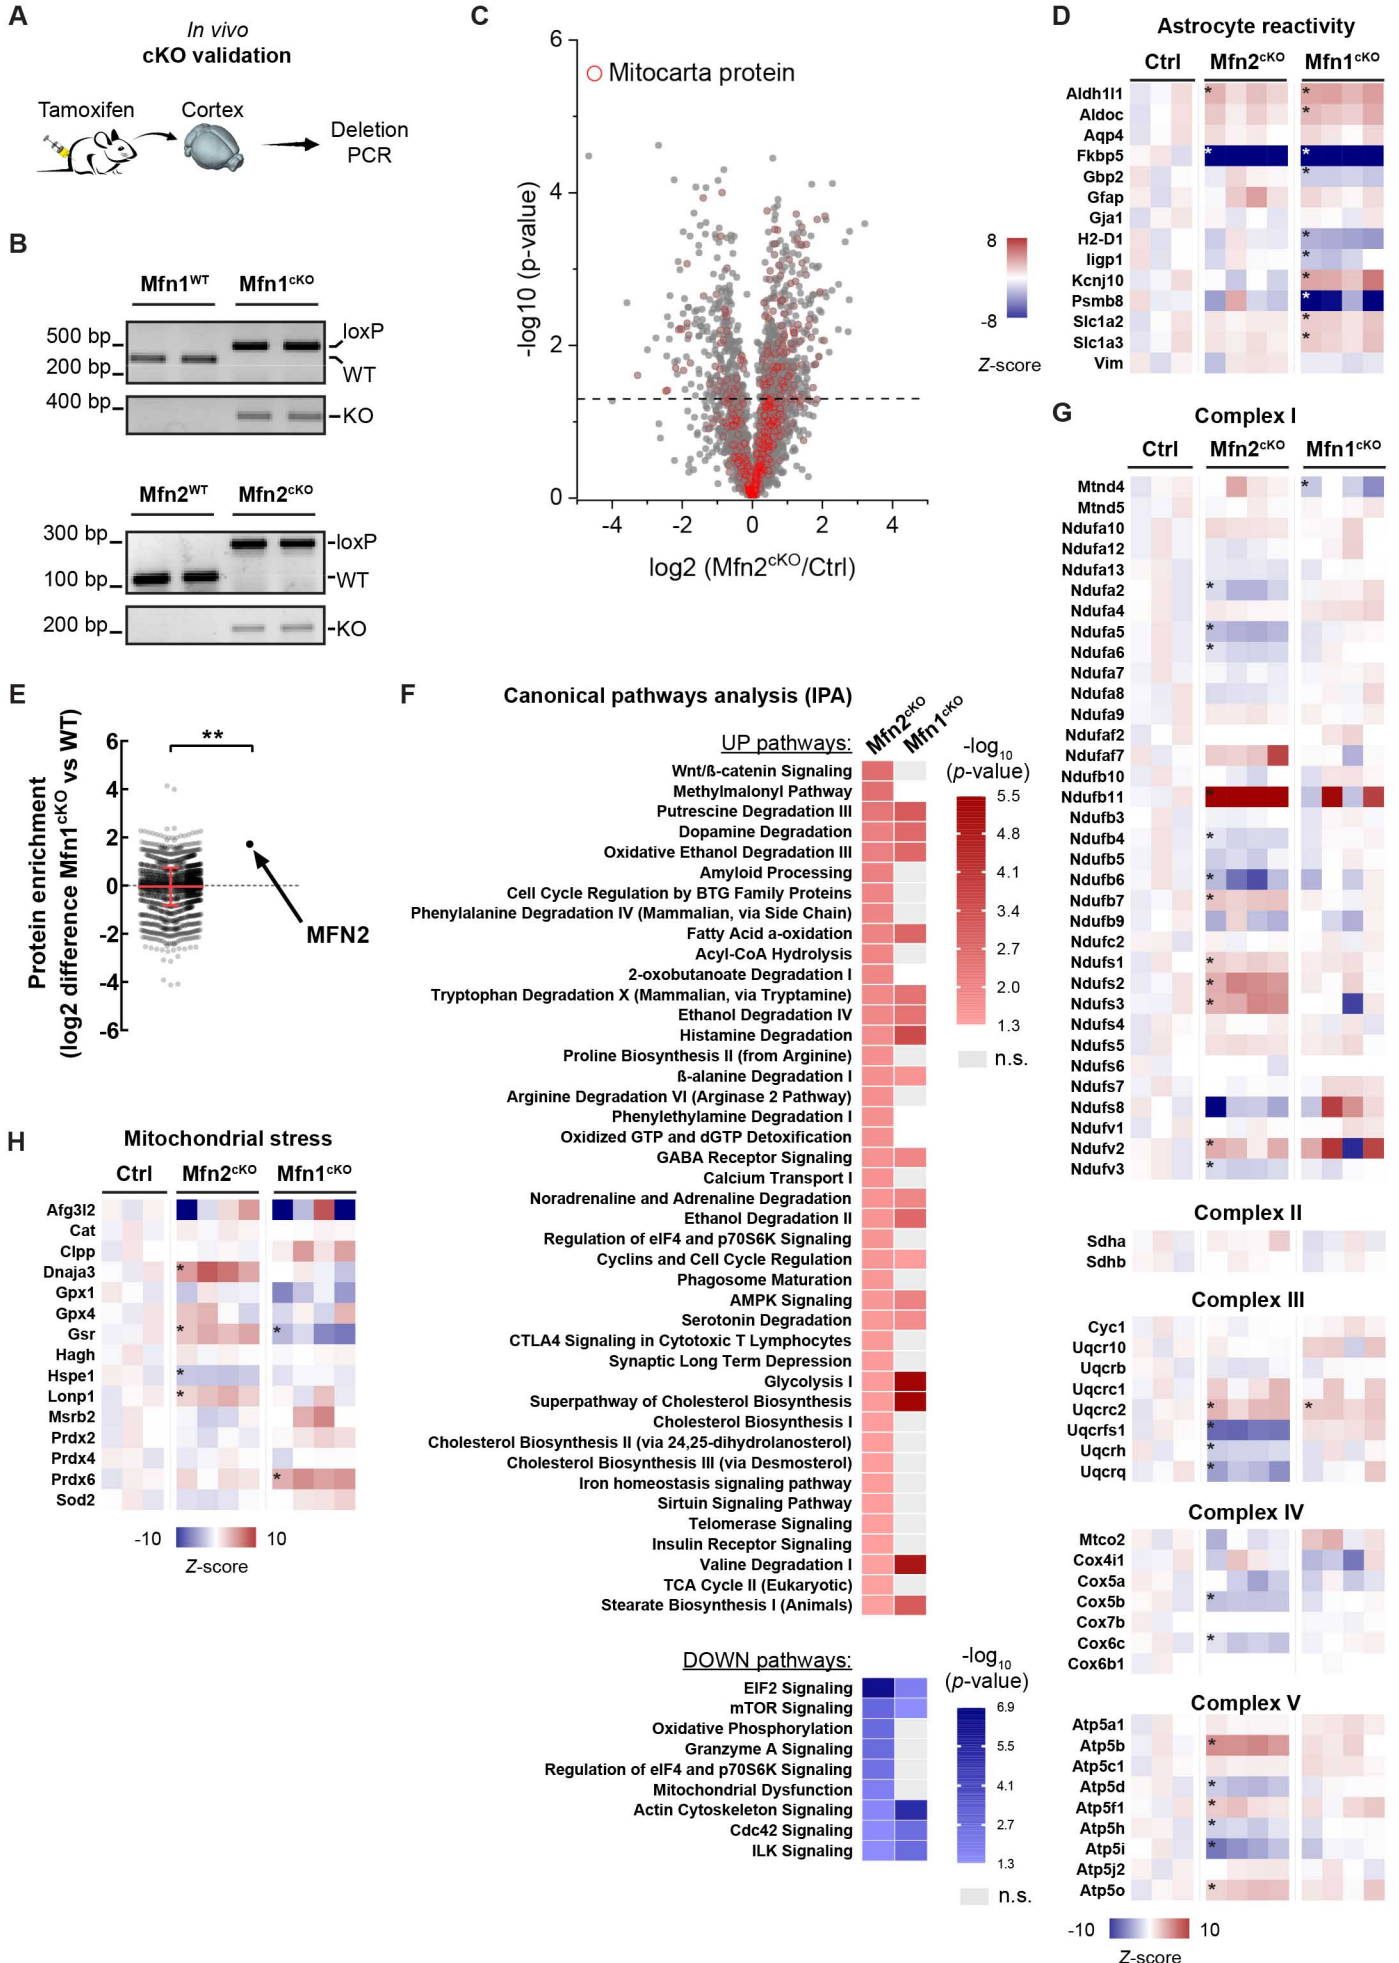

Figure S3

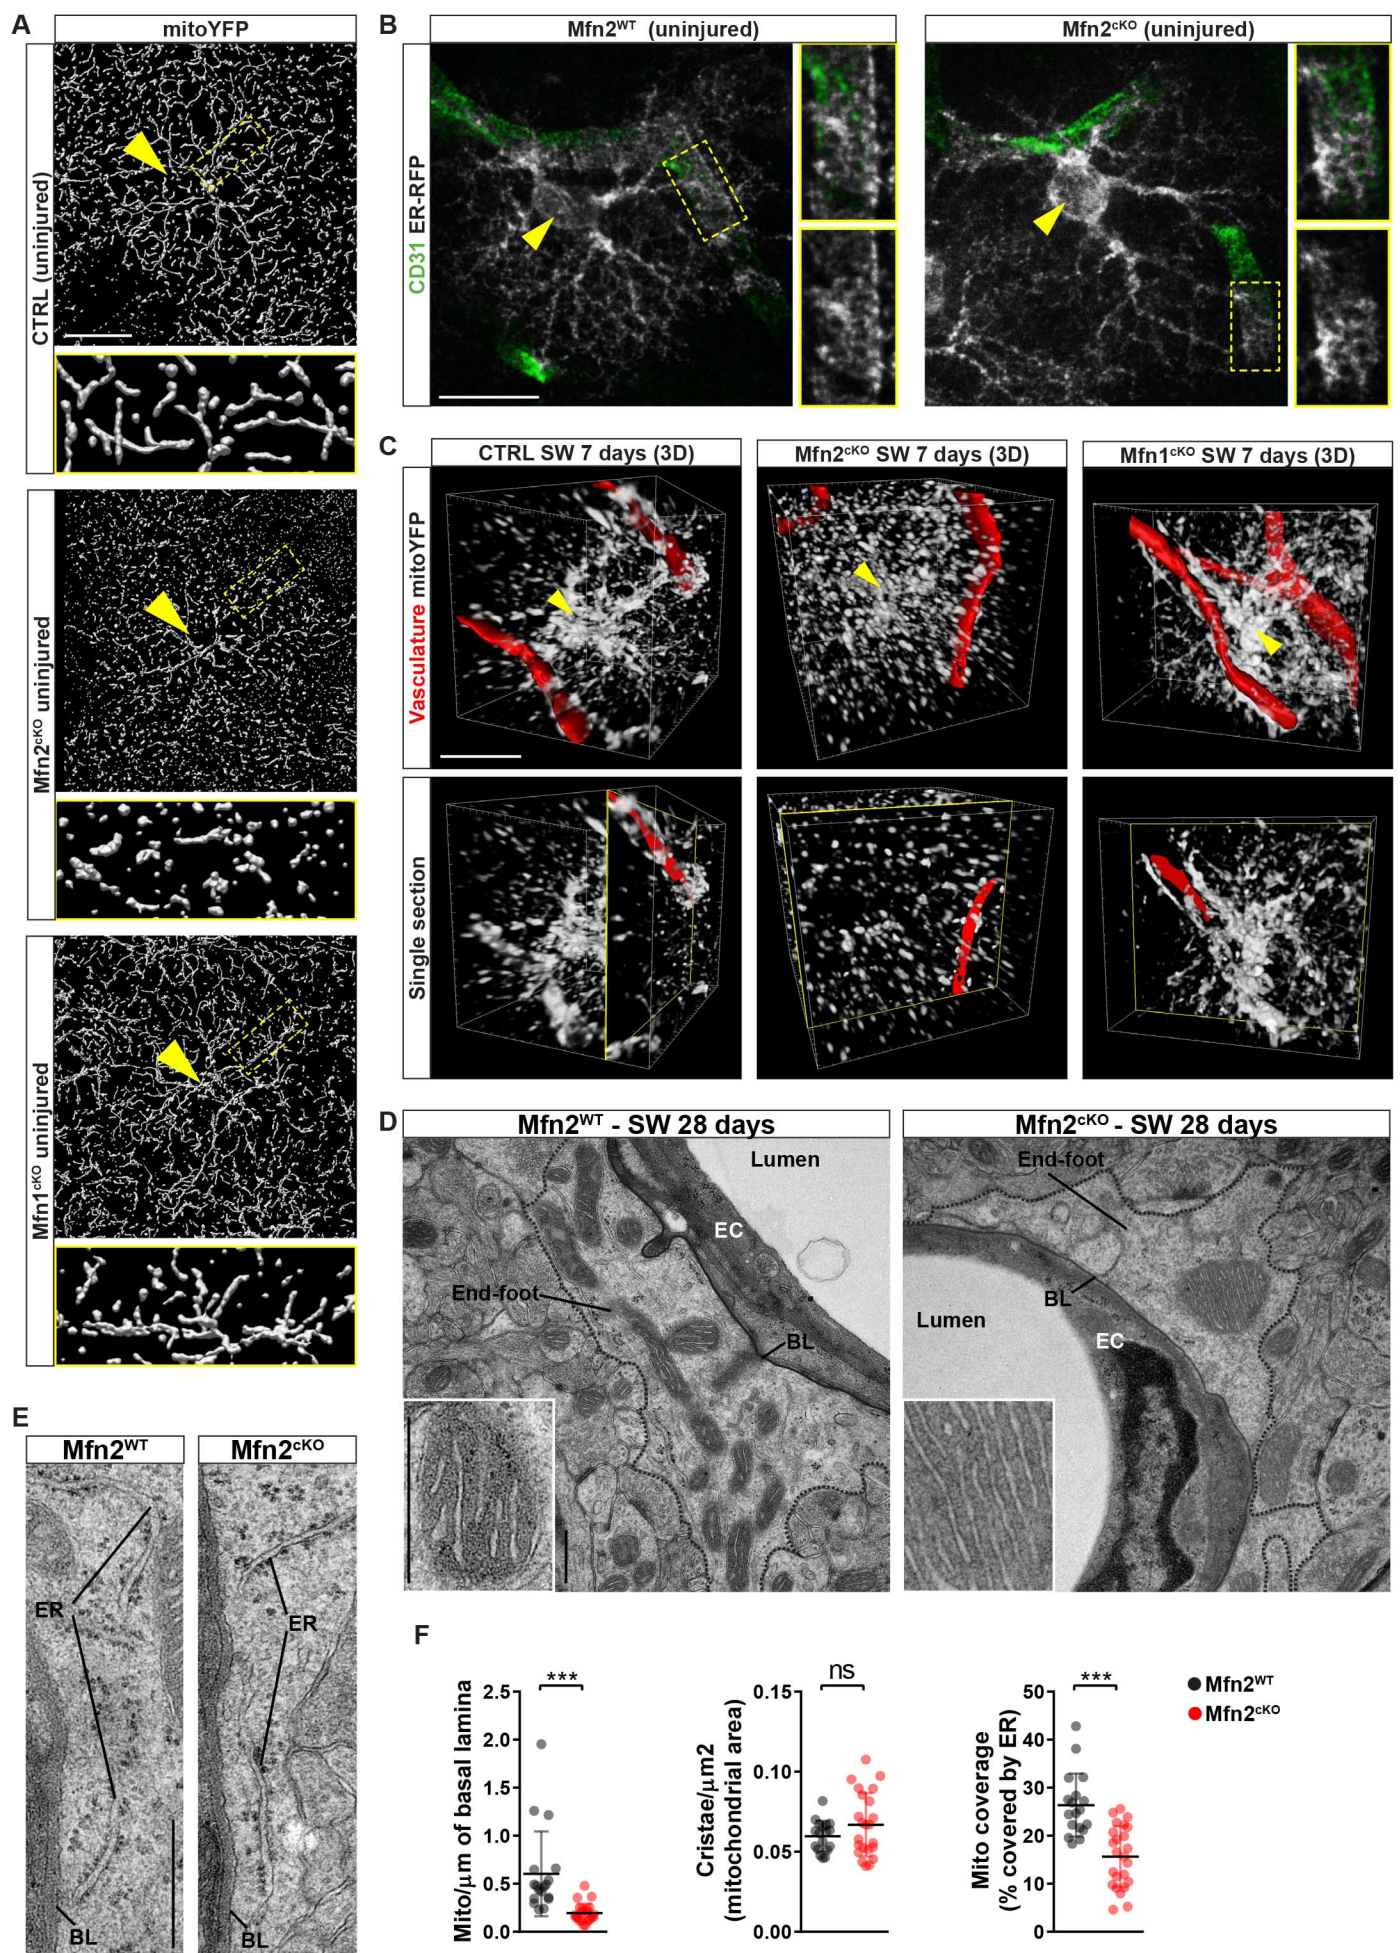

Figure S4

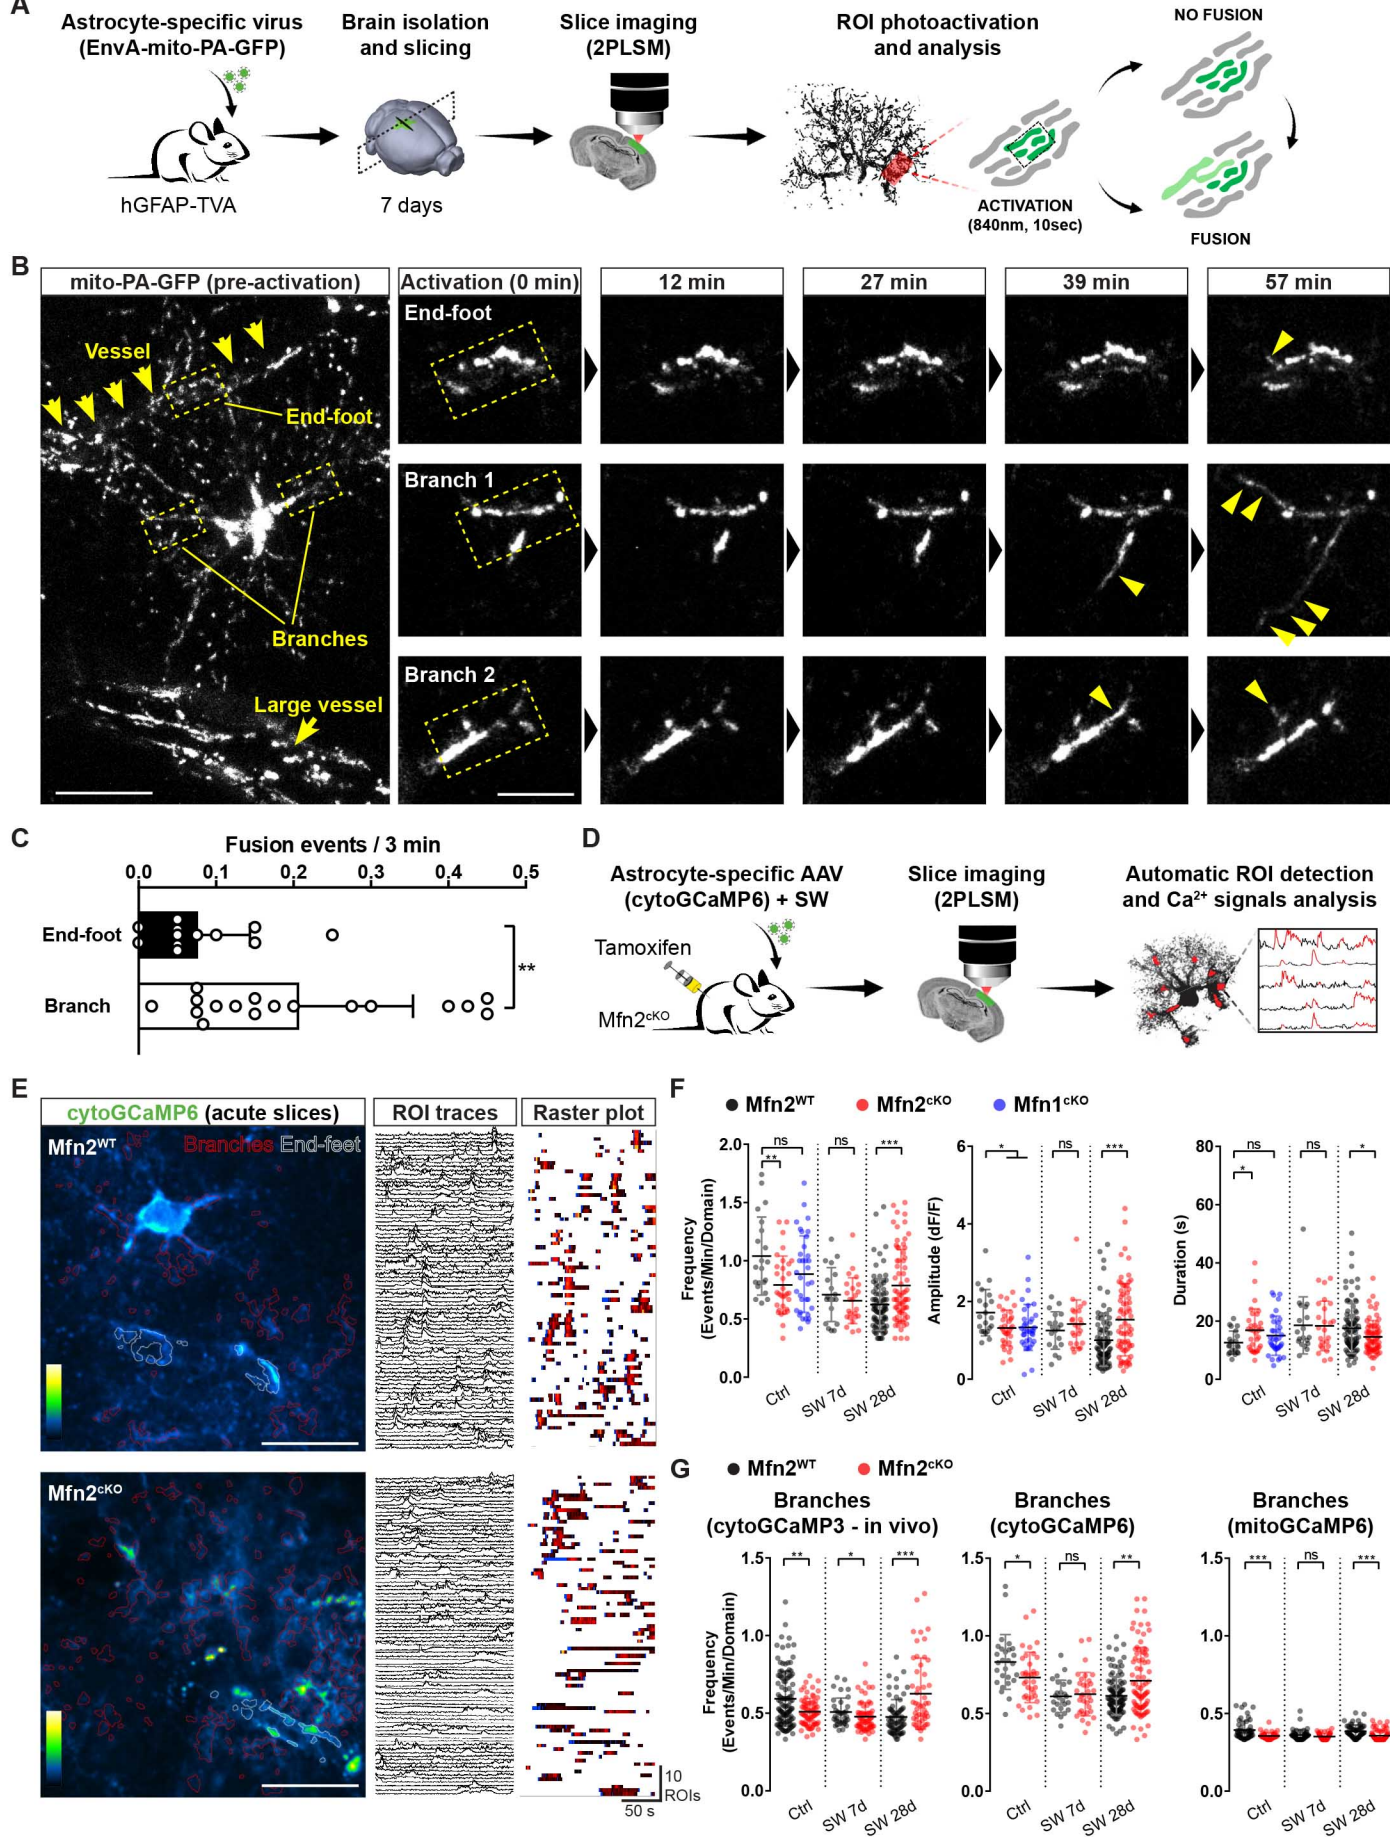

Figure S5

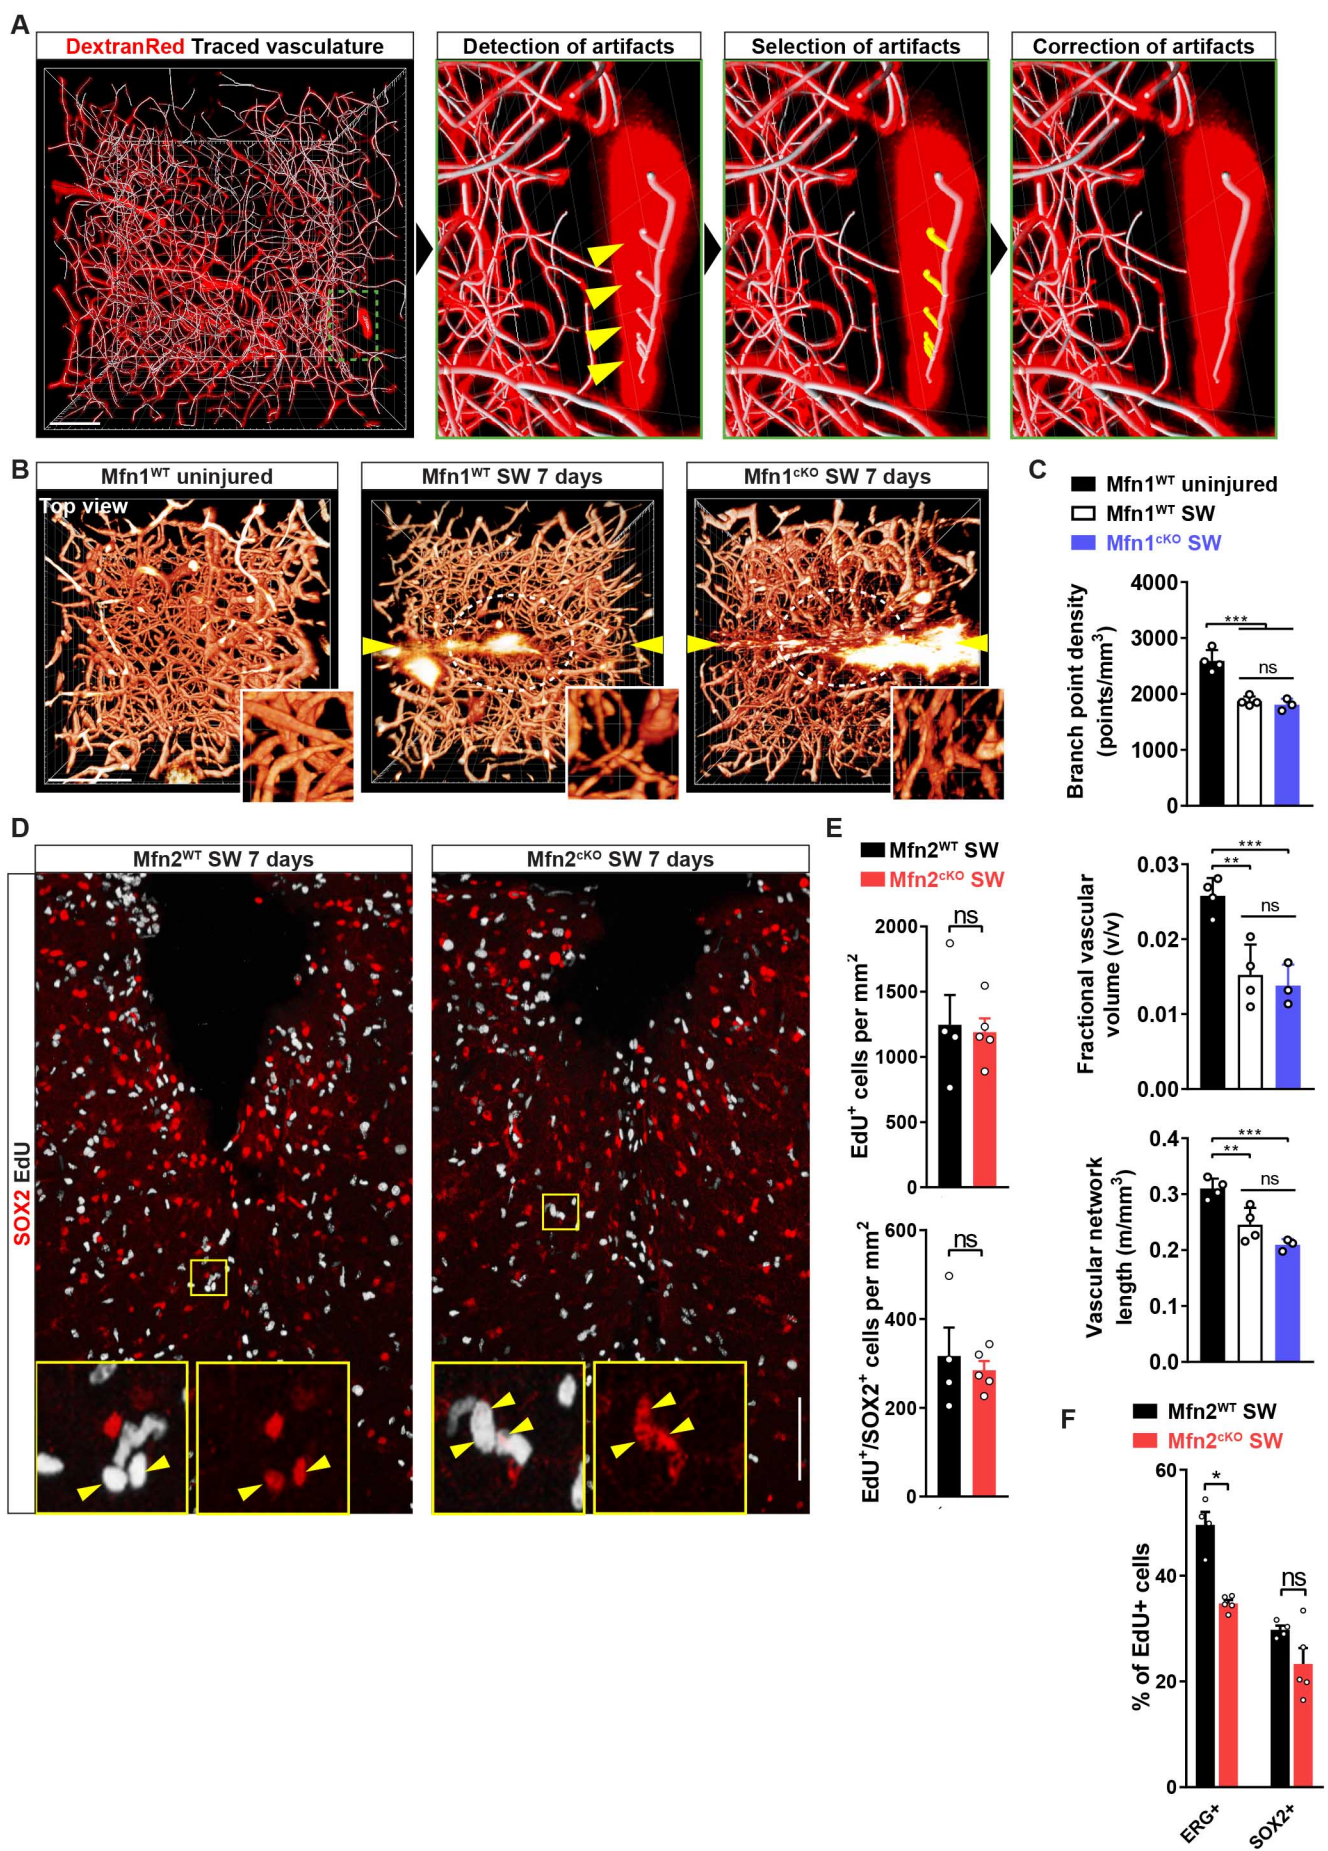

Figure S6

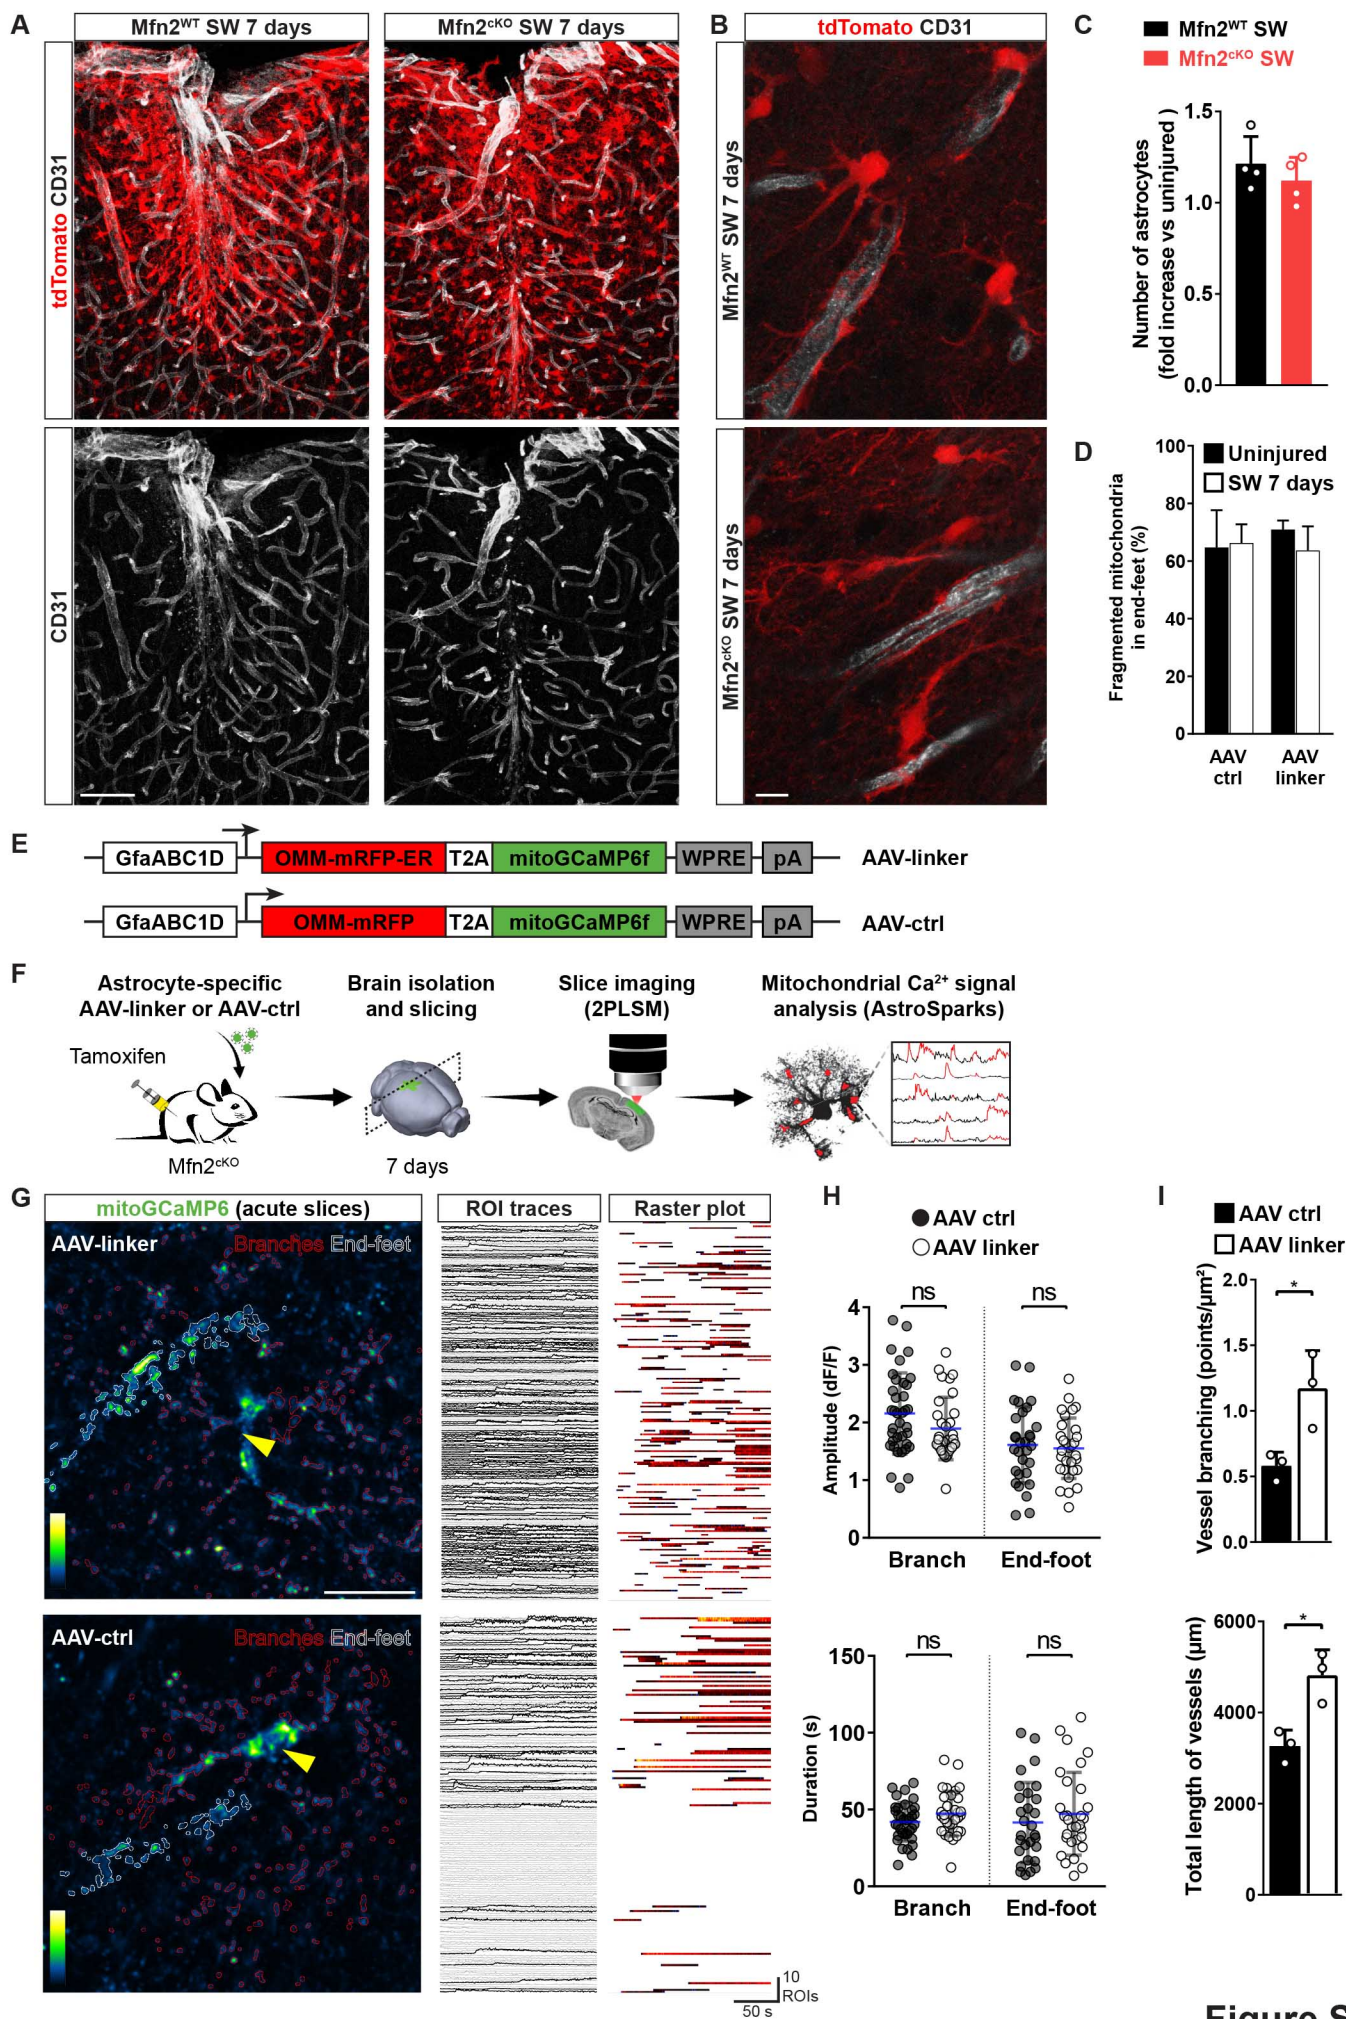

Figure S7
